# Supplementary material for: Helminths-based bi-functional molecule, tuftsin-phosphorylcholine (TPC), ameliorates an established murine arthritis
Source: PLoS One. 2018 Aug 8;13(8):e0200615. doi: 10.1371/journal.pone.0200615 (PMC6082512; doi:10.1371/journal.pone.0200615)
Supplement: S4 File — (XLS) [file pone.0200615.s004.xls]

## Sheet: QuantitativeCurveFit1
QuantitativeCurveFit1
Parameters
	Fit to				Assay: Calibrator
	Fit type				Linear Regressions
	Concentration transform				Linear
	Measurement transform				Linear
	Markers				Mean
	Extrapolation				0...4000.0000000
	Formula				y = ax + b
	Parameter a				0.000878591
	Parameter b				0.050406
	Coefficient of determination R2				0.99
Plate	Well	Sample	Conc.	Original [Abs]	Fitted [Abs]	Residual
		Cal_0001	31.25	0.0199	0.077862	-0.057962
Plate 1	B01	Cal_0001 1/2	31.25	0.0194	0.077862	-0.058462
Plate 1	B02	Cal_0001 2/2	31.25	0.0204	0.077862	-0.057462
		Cal_0002	62.5	0.05635	0.105318	-0.048968
Plate 1	C01	Cal_0002 1/2	62.5	0.0529	0.105318	-0.052418
Plate 1	C02	Cal_0002 2/2	62.5	0.0598	0.105318	-0.045518
		Cal_0003	125	0.1388	0.16023	-0.0214299
Plate 1	D01	Cal_0003 1/2	125	0.1385	0.16023	-0.0217299
Plate 1	D02	Cal_0003 2/2	125	0.1391	0.16023	-0.0211299
		Cal_0004	250	0.29185	0.270054	0.0217962
Plate 1	E01	Cal_0004 1/2	250	0.3003	0.270054	0.0302462
Plate 1	E02	Cal_0004 2/2	250	0.2834	0.270054	0.0133462
		Cal_0005	500	0.58125	0.489702	0.0915485
Plate 1	F01	Cal_0005 1/2	500	0.5867	0.489702	0.0969985
Plate 1	F02	Cal_0005 2/2	500	0.5758	0.489702	0.0860985
		Cal_0006	1000	1.0027	0.928997	0.073703
Plate 1	G01	Cal_0006 1/2	1000	0.9682	0.928997	0.039203
Plate 1	G02	Cal_0006 2/2	1000	1.0372	0.928997	0.108203
		Cal_0007	2000	1.7489	1.80759	-0.0586879
Plate 1	H01	Cal_0007 1/2	2000	1.6936	1.80759	-0.113988
Plate 1	H02	Cal_0007 2/2	2000	1.8042	1.80759	-0.0033879
Plate 1: Plate 1
Abs	1	2	3	4	5	6	7	8	9	10	11	12
A			0.1369	0.4419	0.3057	0.2703	0.589	0.2868
B	0.0194	0.0204	0.061	0.3471	0.3488	0.3045	0.32	0.4977
C	0.0529	0.0598	0.2402	0.37	0.1273	0.2202	-0.0017	0.0076
D	0.1385	0.1391	1.5518	1.5533	0.8727	0.4394
E	0.3003	0.2834	1.6608	1.5826	0.1009	0.6299
F	0.5867	0.5758	1.7033	1.4524	0.1912	0.5882
G	0.9682	1.0372	0.3898	0.367	0.2824	0.3877
H	1.6936	1.8042	0.3673	0.2046	0.2319	0.2918
Fitted conc.	1	2	3	4	5	6	7	8	9	10	11	12
A			98.4462	445.593	290.572	250.28	613.02	269.06
B			12.0579	337.693	339.628	289.206	306.848	509.104
C			216.021	363.757	87.5196	193.257	לא מספר	לא מספר
D			1708.87	1710.57	935.924	442.748
E			1832.93	1743.92	57.4715	659.572
F			1881.3	1595.73	160.25	612.11
G			386.293	360.343	264.052	383.903
H			360.684	175.501	206.574	274.751
Sample	1	2	3	4	5	6	7	8	9	10	11	12
A			PBS_1 1/2	PBS_1 2/2	T_3 1/2	T_3 2/2	0_2 1/2	0_2 2/2
B	Cal_0001 1/2	Cal_0001 2/2	PBS_2 1/2	PBS_2 2/2	PC_1 1/2	PC_1 2/2	0_3 1/2	0_3 2/2
C	Cal_0002 1/2	Cal_0002 2/2	PBS_3 1/2	PBS_3 2/2	PC_2 1/2	PC_2 2/2	M 1/2	M 2/2
D	Cal_0003 1/2	Cal_0003 2/2	TPC_1 1/2	TPC_1 2/2	PC_3 1/2	PC_3 2/2
E	Cal_0004 1/2	Cal_0004 2/2	TPC_2 1/2	TPC_2 2/2	T+PC_1 1/2	T+PC_1 2/2
F	Cal_0005 1/2	Cal_0005 2/2	TPC_3 1/2	TPC_3 2/2	T+PC_2 1/2	T+PC_2 2/2
G	Cal_0006 1/2	Cal_0006 2/2	T_1 1/2	T_1 2/2	T+PC_3 1/2	T+PC_3 2/2
H	Cal_0007 1/2	Cal_0007 2/2	T_2 1/2	T_2 2/2	0_1 1/2	0_1 2/2
Dilution	1	2	3	4	5	6	7	8	9	10	11	12
A			1:1	1:1	1:1	1:1	1:1	1:1
B			1:1	1:1	1:1	1:1	1:1	1:1
C			1:1	1:1	1:1	1:1	1:1	1:1
D			1:1	1:1	1:1	1:1
E			1:1	1:1	1:1	1:1
F			1:1	1:1	1:1	1:1
G			1:1	1:1	1:1	1:1
H			1:1	1:1	1:1	1:1
Result	1	2	3	4	5	6	7	8	9	10	11	12
A			98.4462	445.593	290.572	250.28	613.02	269.06
B			12.0579	337.693	339.628	289.206	306.848	509.104
C			216.021	363.757	87.5196	193.257	לא מספר	לא מספר
D			1708	1710	935.924	442.748
E			1832.93	1743.92	57.4715	659.572
F			1881.3	1595.73	160.25	612.11
G			386.293	360.343	264.052	383.903
H			360.684	175.501	206.574	274.751
				TPC	PBS	T	PC	T+PC	None
				1708	98.4462	386.293	339.628	57.4715	206.574
				1832.93	12.0579	360.684	87.5196	160.25	613.02
				1881.3	216.021	290.572	935.924	264.052	306.848
				1710	445.593	360.343	289.206	659.572	274.751
				1743.92	337.693	175.501	193.257	612.11	269.06
				1595.73	363.757	250.28	442.748	383.903	509.104
			avg	1745.31	245.595	303.946	381.38	356.226	363.226
			std	101.178	167.039	80.917	297.748	242.66	160.057
			ptpc		4.68004e-08	2.27053e-10	3.52151e-05	5.56878e-06	5.23216e-08
					TPC	PBS	T	PC	T+PC	None
					1708	98.4462	386.293	339.628	500	206.574
					1832.93	330	360.684	87.5196	160.25	613.02
					1881.3	216.021	290.572	450	264.052	306.848
					1710	445.593	360.343	289.206	659.572	274.751
					1743.92	337.693	175.501	193.257	612.11	269.06
					1595.73	363.757	250.28	442.748	383.903	509.104
					1800	320	313	250	479	403
					1730	286	293	310	409	363
					1740	296	343	340	400	333
					1710	290	263	300	428	353
				avg	1745.19	298.351	303.567	300.236	429.589	363.136
				std	78.6593	91.86	63.3684	108.169	147.927	120.504
				ptpc		2.6994e-18	2.51108e-19	1.05697e-16	8.53686e-13	3.1632e-15
					TPC	PBS	T	PC	None
					1708	98.4462	386.293	339.628	206.574
					1832.93	330	360.684	87.5196	613.02
					1881.3	216.021	290.572	450	306.848
					1710	445.593	360.343	289.206	274.751
					1743.92	337.693	175.501	193.257	269.06
					1595.73	363.757	250.28	442.748	509.104
					1800	320	313	250	403
					1730	286	293	310	363
					1740	296	343	340	333
					1710	290	263	300	353
					Anova: Single Factor
					SUMMARY
					Groups	Count	Sum	Average	Variance
					TPC	10	17451.9	1745.19	6187.29
					PBS	10	2983.51	298.351	8438.26
					T	10	3035.67	303.567	4015.55
					PC	10	3002.36	300.236	11700.6
					None	10	3631.36	363.136	14521.2
					ANOVA
					Source of Variation	SS	df	MS	F	P-value	F crit
					Between Groups	1.63626e+07	4	4.09065e+06	455.906	8.89139e-36	2.57874
					Within Groups	403766	45	8972.58
					Total	1.67664e+07	49
